# Supplementary material for: An antiviral oligomerized linear thiopeptide with a nitrile group from soil-derived Streptomyces sp. CPCC 203702
Source: Royal Society of Chemistry journal article supplement (doi:10.1039/d4ra01496k), 2024-01-01

## Supplementary Information

### **Antiviral oligomerized linear thiopeptide with nitrile group from soil-derived *Streptomyces* sp. CPCC 203702**

Zhe Guo,<sup>‡a</sup> Dewu Zhang,<sup>‡\*a</sup> Yujia Wang,<sup>b</sup> Jinglin Bai,<sup>a,b</sup> Jun Hu,<sup>a</sup> Shan Cen,<sup>b</sup> and Liyan Yu<sup>\*,a,b</sup>

<sup>a</sup>*China Pharmaceutical Culture Collection, Institute of Medicinal Biotechnology, Chinese Academy of Medical Sciences and Peking Union Medical College, Beijing 100050, People's Republic of China*

<sup>b</sup>*Division for Medicinal Microorganisms Related Strains, CAMS Collection Center of Pathogenic Microorganisms, Beijing 100050, People's Republic of China*

<sup>‡</sup>These authors contributed equally to this work.

\*Corresponding authors. E-mail: zhangdewuever@163.com (D. Zhang) or yly@cpcc.ac.cn (L. Yu)

## Contents

|                                                                                             |     |
|---------------------------------------------------------------------------------------------|-----|
| <b>Figure S1.</b> Marfey's analyse of <b>1</b> and amino acids derivatized with L-FDAA..... | S3  |
| <b>Figure S2.</b> $^1\text{H}$ NMR spectrum of <b>1</b> .....                               | S4  |
| <b>Figure S3.</b> $^{13}\text{C}$ NMR spectrum of <b>1</b> .....                            | S5  |
| <b>Figure S4.</b> DEPT spectrum of <b>1</b> .....                                           | S6  |
| <b>Figure S5.</b> HSQC spectrum of <b>1</b> .....                                           | S7  |
| <b>Figure S6.</b> $^1\text{H}$ - $^1\text{H}$ COSY spectrum of <b>1</b> .....               | S8  |
| <b>Figure S7.</b> HMBC spectrum of <b>1</b> .....                                           | S9  |
| <b>Figure S8.</b> NOESY spectrum of <b>1</b> .....                                          | S10 |
| <b>Figure S9.</b> HRESIMS spectrum of <b>1</b> .....                                        | S11 |
| <b>Figure S10.</b> UV spectrum of <b>1</b> .....                                            | S12 |
| <b>Figure S11.</b> ECD spectrum of <b>1</b> .....                                           | S13 |

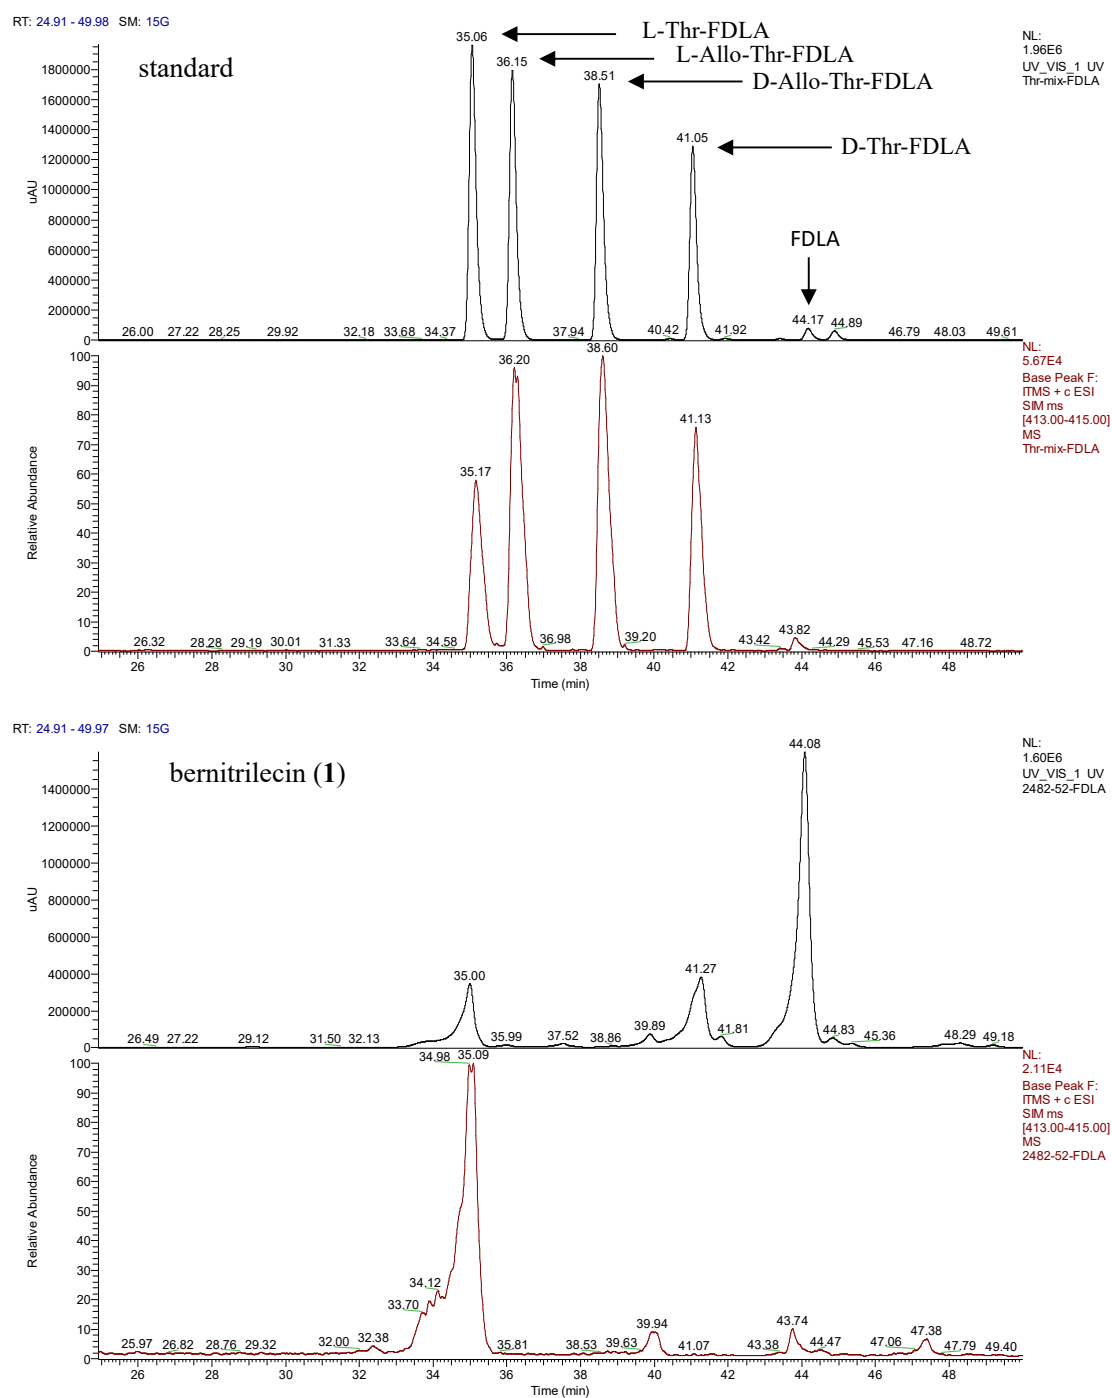

**Figure S1.** Marfey's analysis of **1** and amino acids derivatized with L-FDAA

Figure S2. <sup>1</sup>H NMR spectrum of **1**

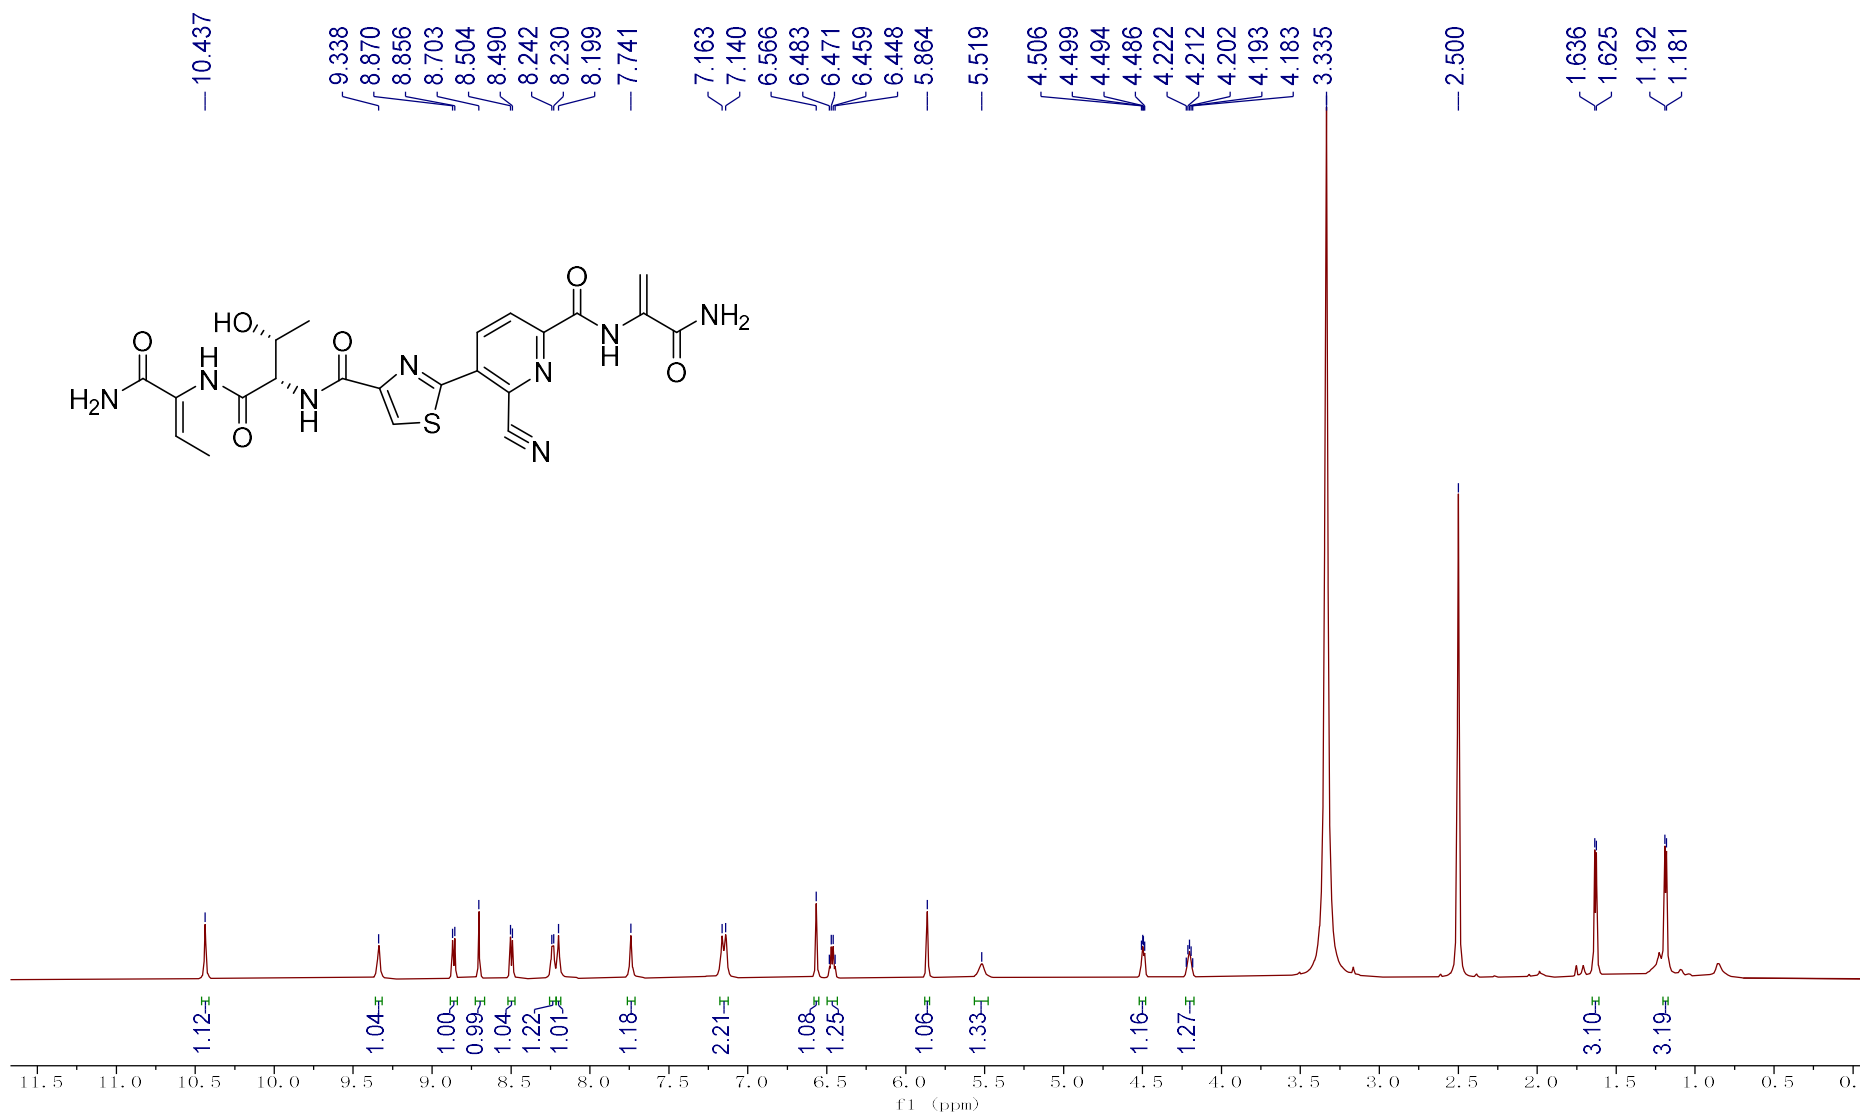

Figure S3.  $^{13}\text{C}$  NMR spectrum of **1**

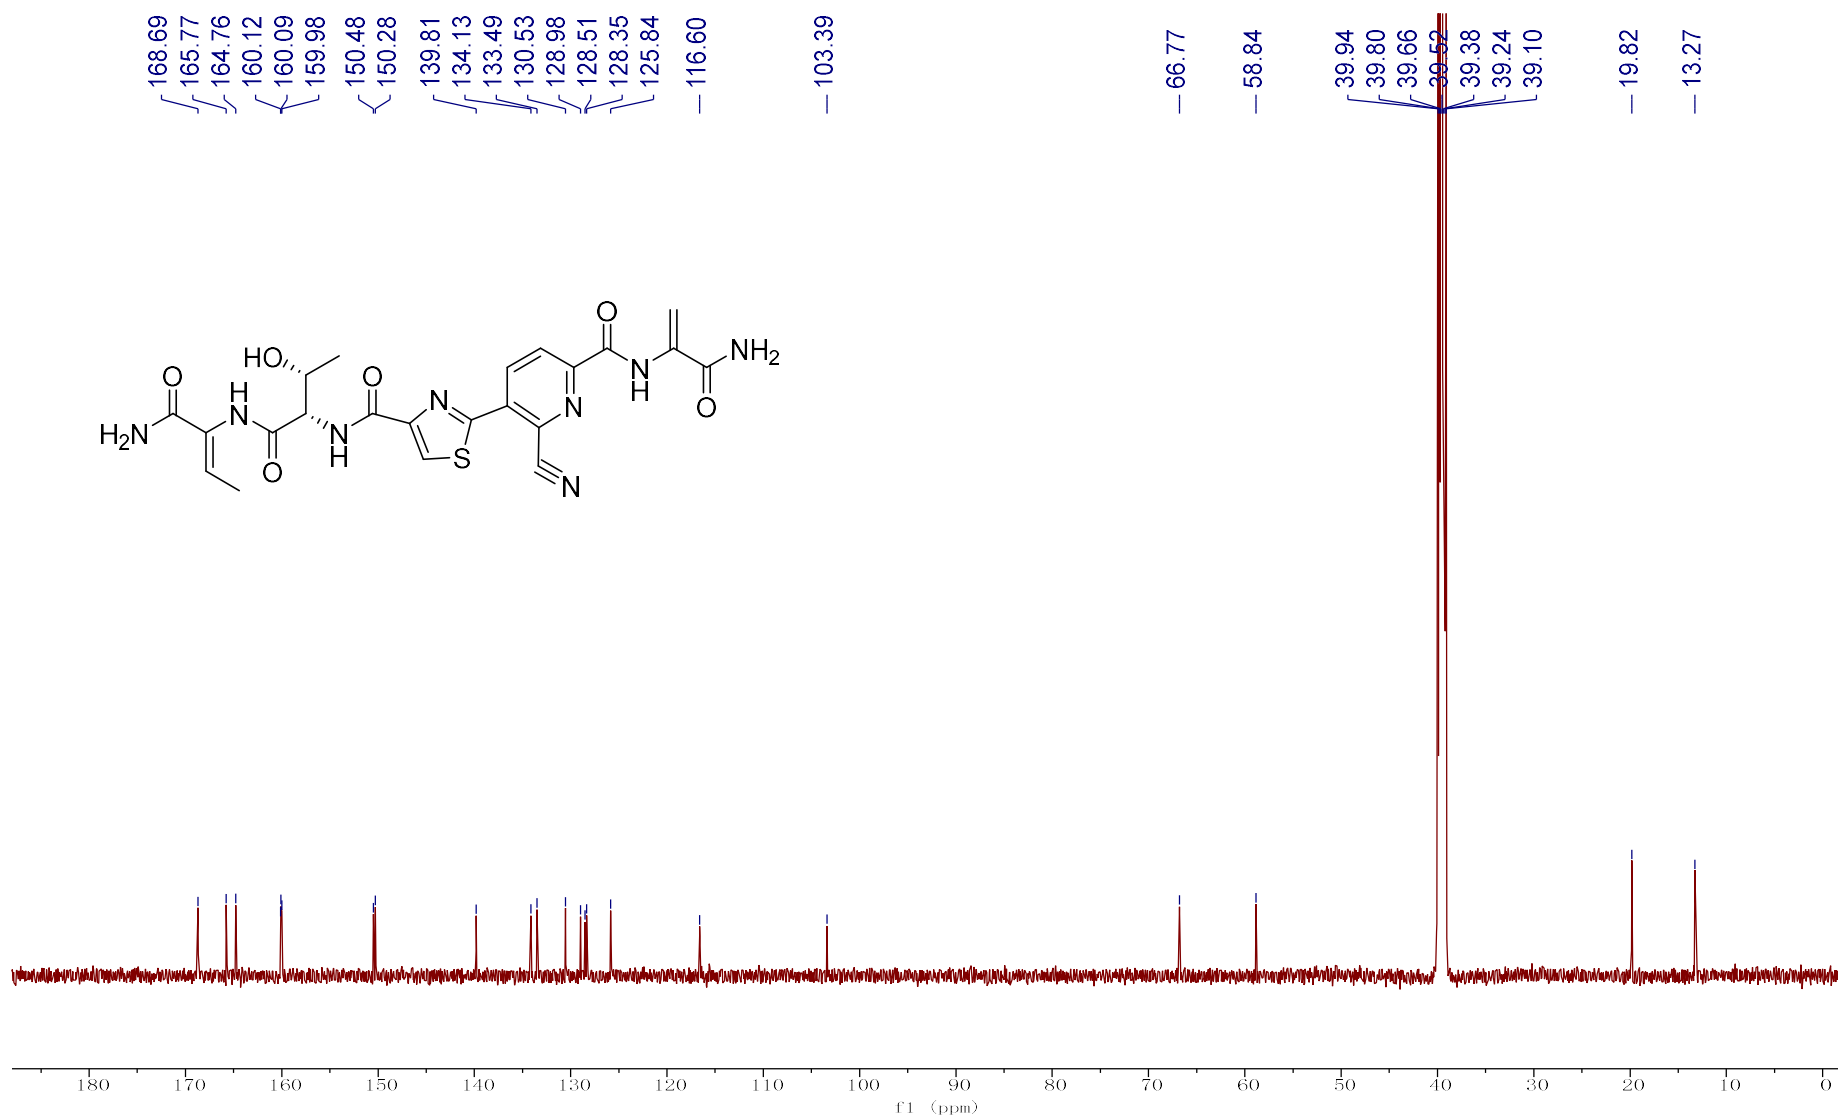

Figure S4. DEPT spectrum of 1

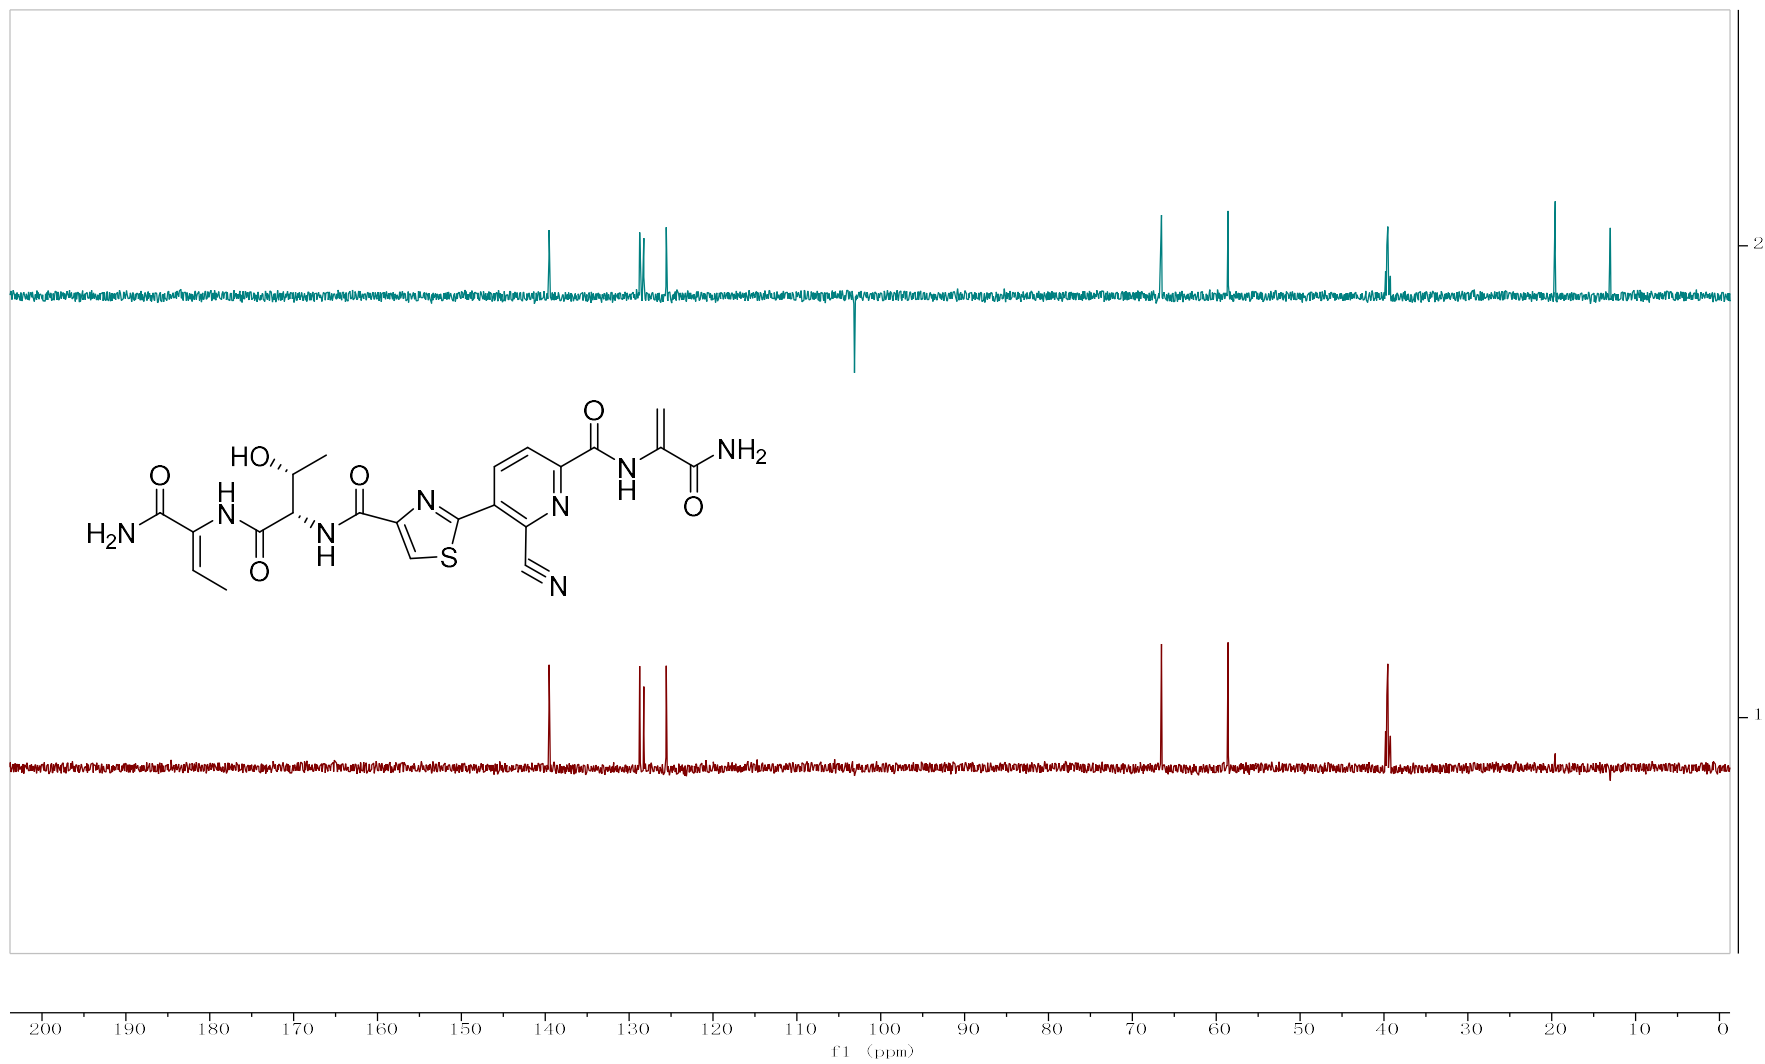

Figure S5. HSQC spectrum of 1

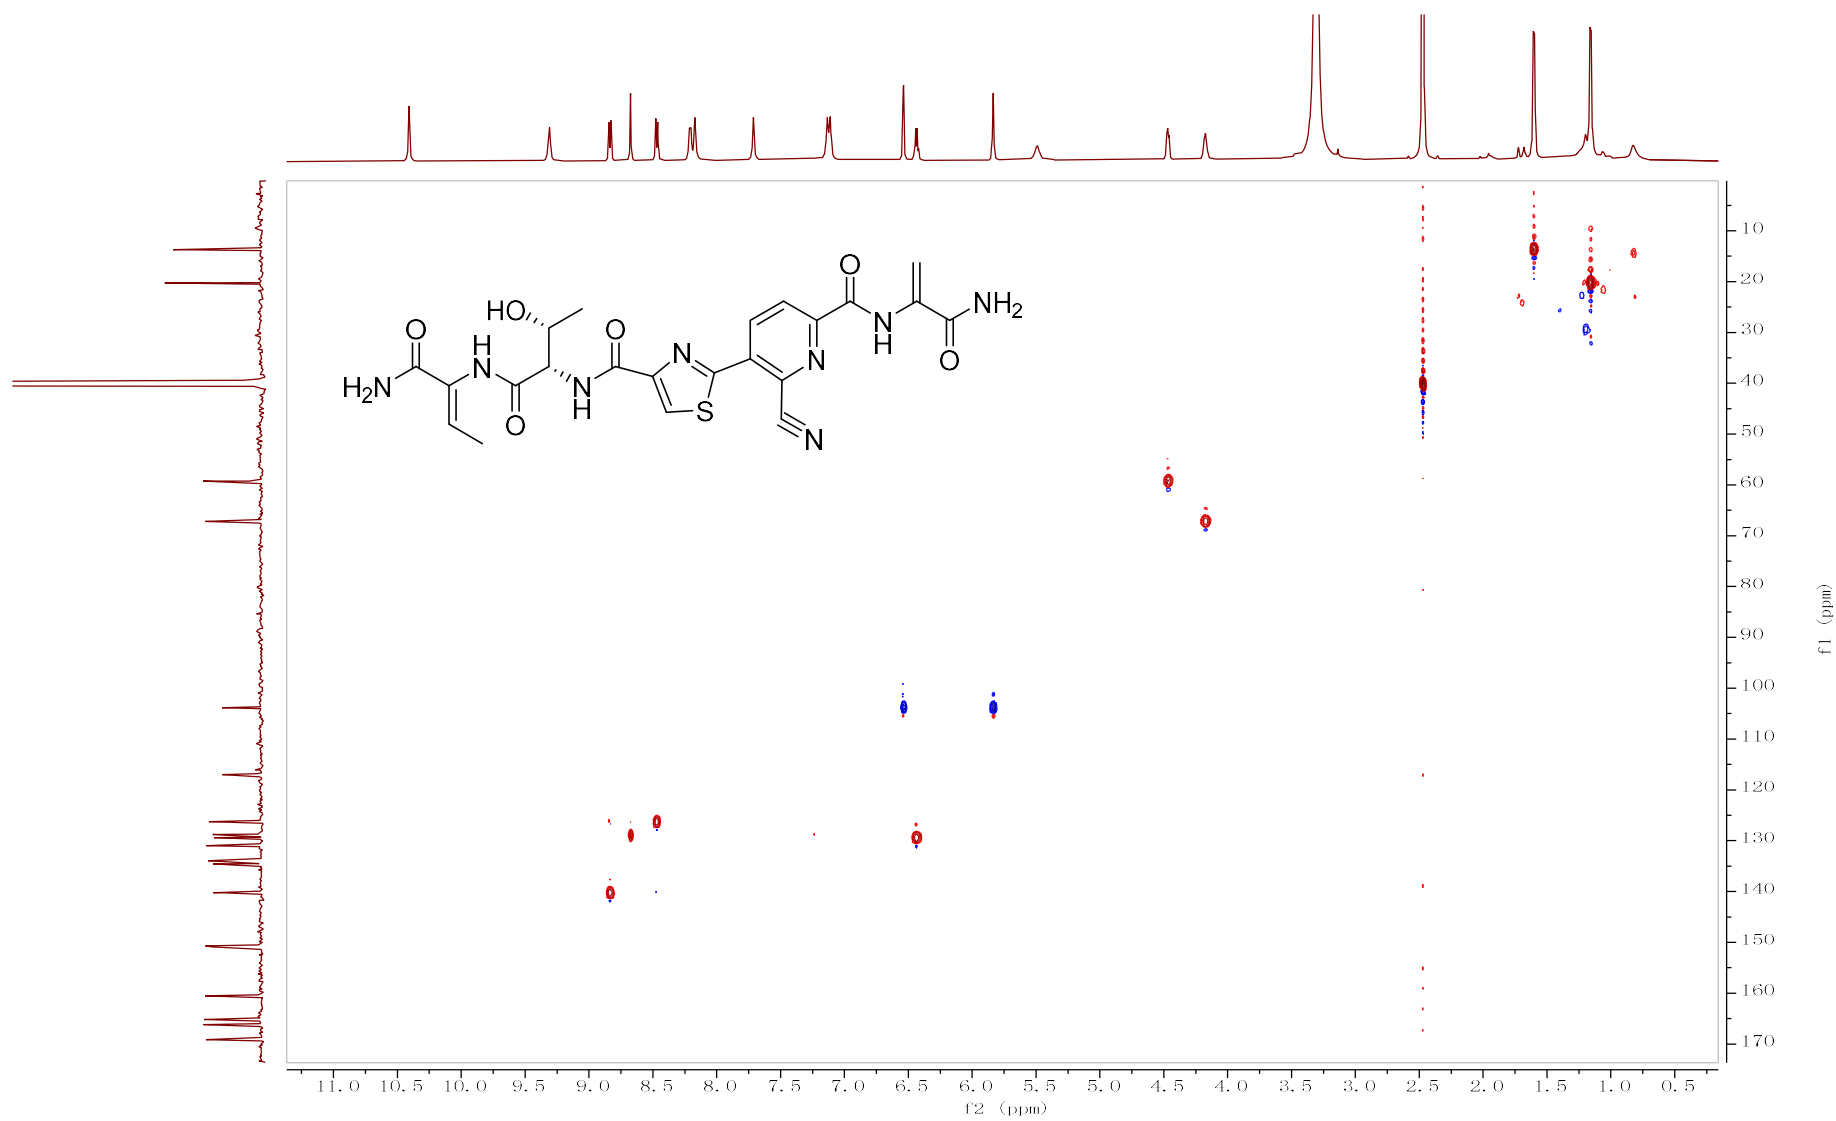

Figure S6.  $^1\text{H}$ - $^1\text{H}$  COSY spectrum of **1**

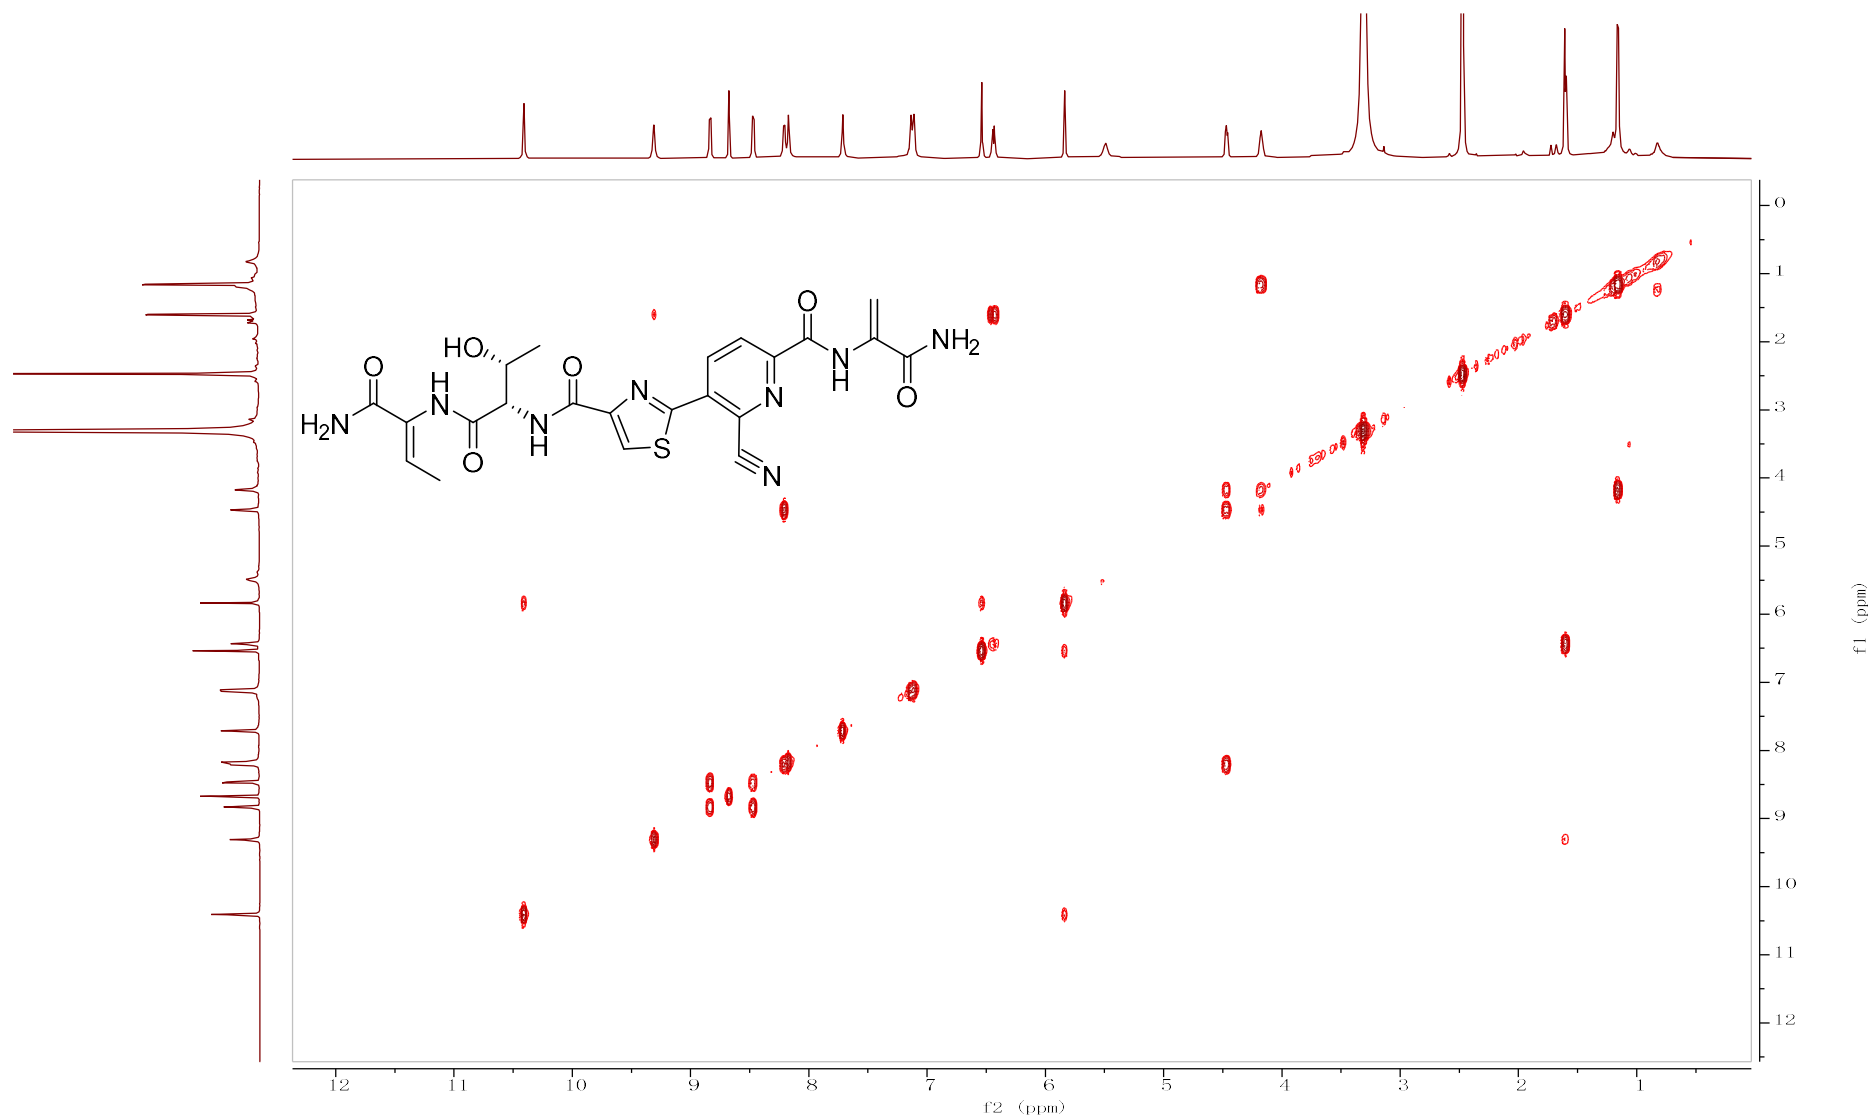



Figure S7. HMBC spectrum of **1**

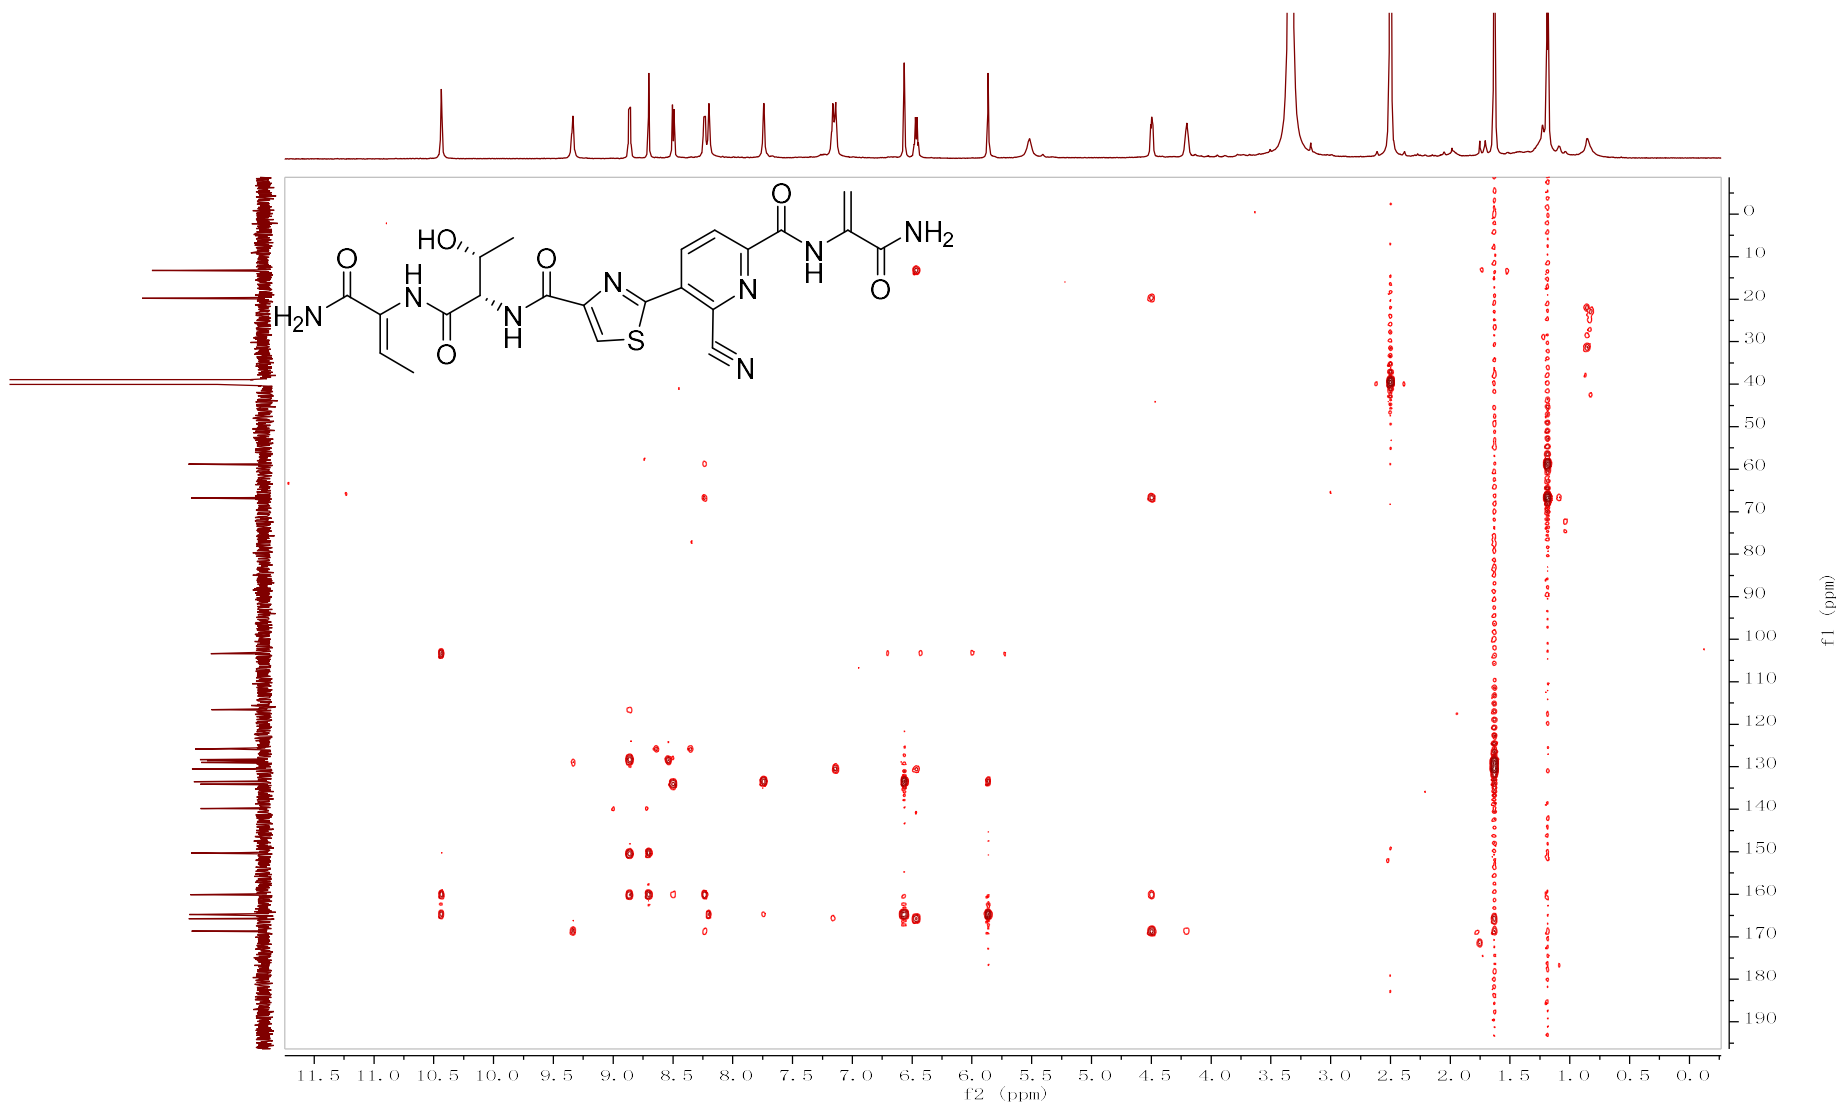

Figure S8. NOESY spectrum of **1**

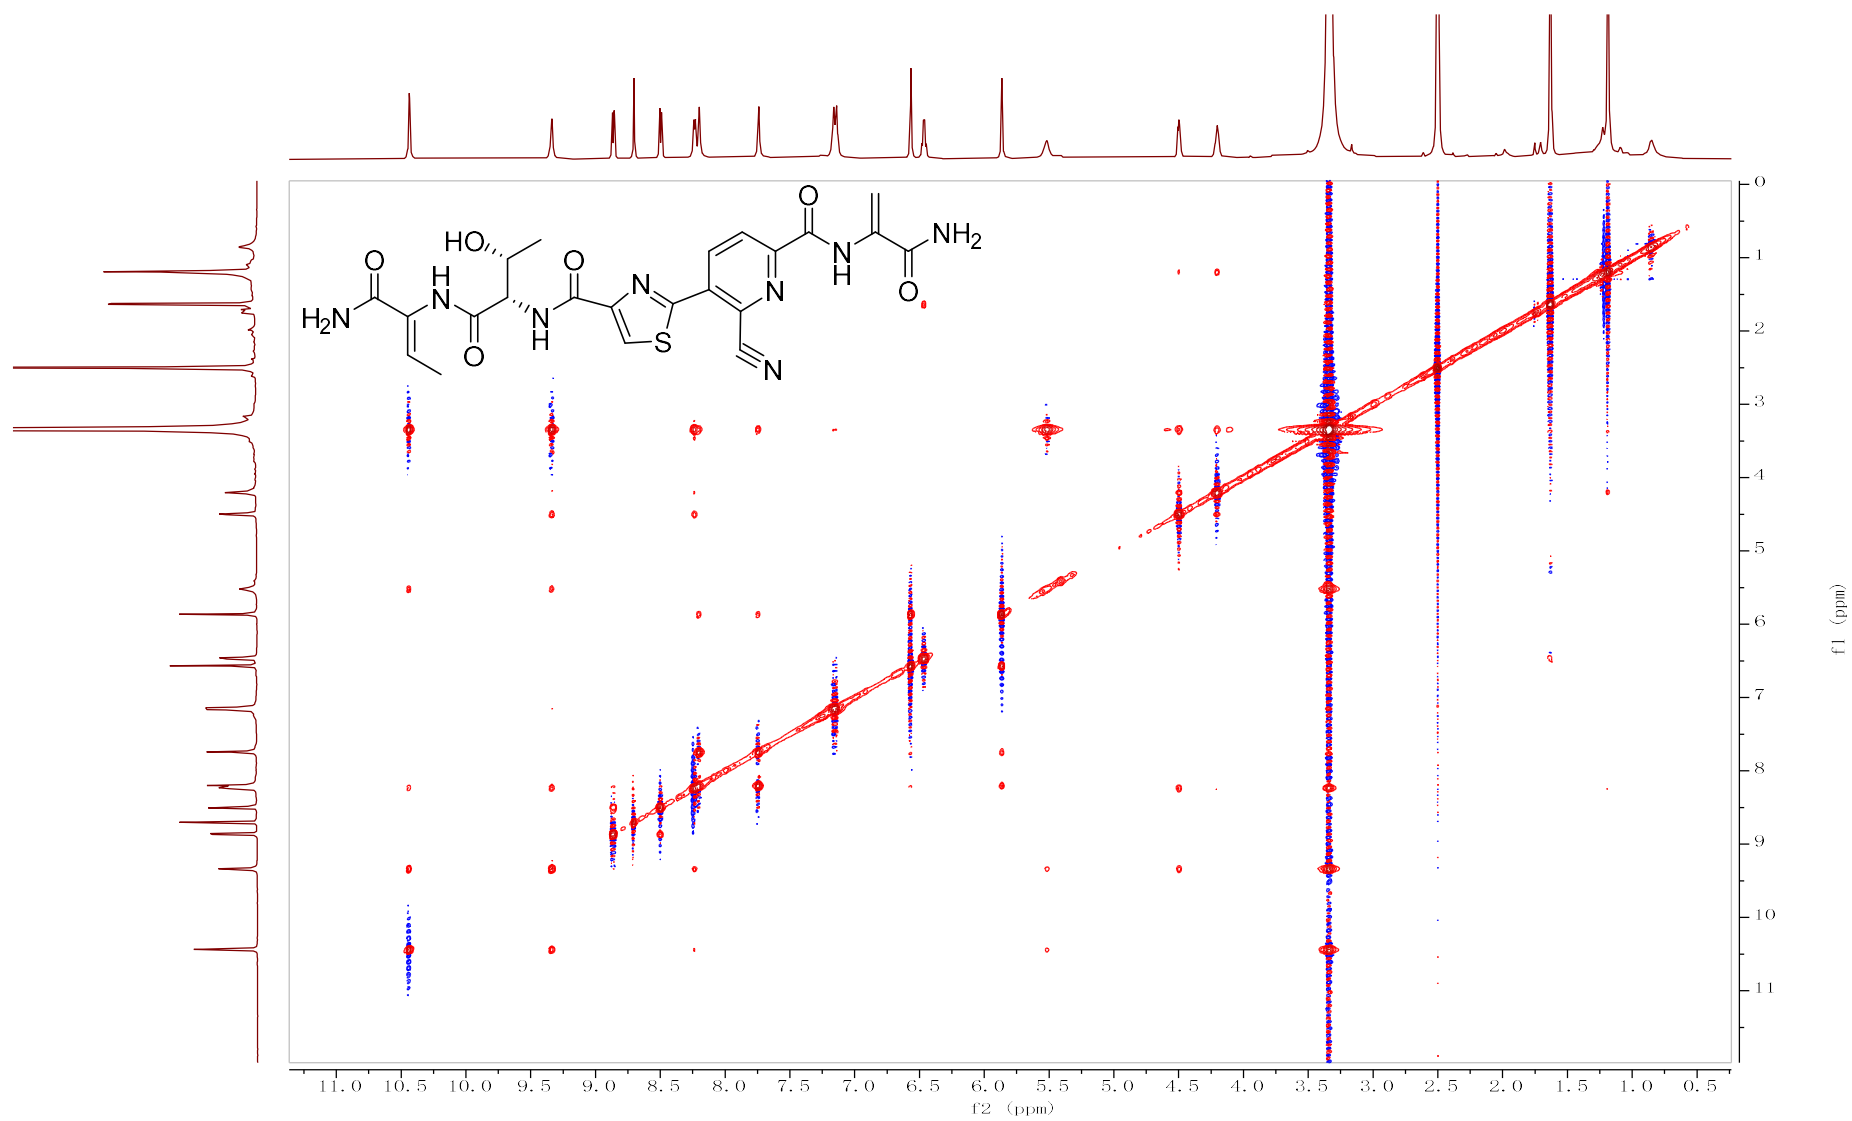

**Figure S9.** HRESIMS spectrum of **1**

2482-5-2 #85 RT: 0.67 AV: 1 NL: 8.54E5

T: FTMS + c ESI Full ms [50.00-1000.00]

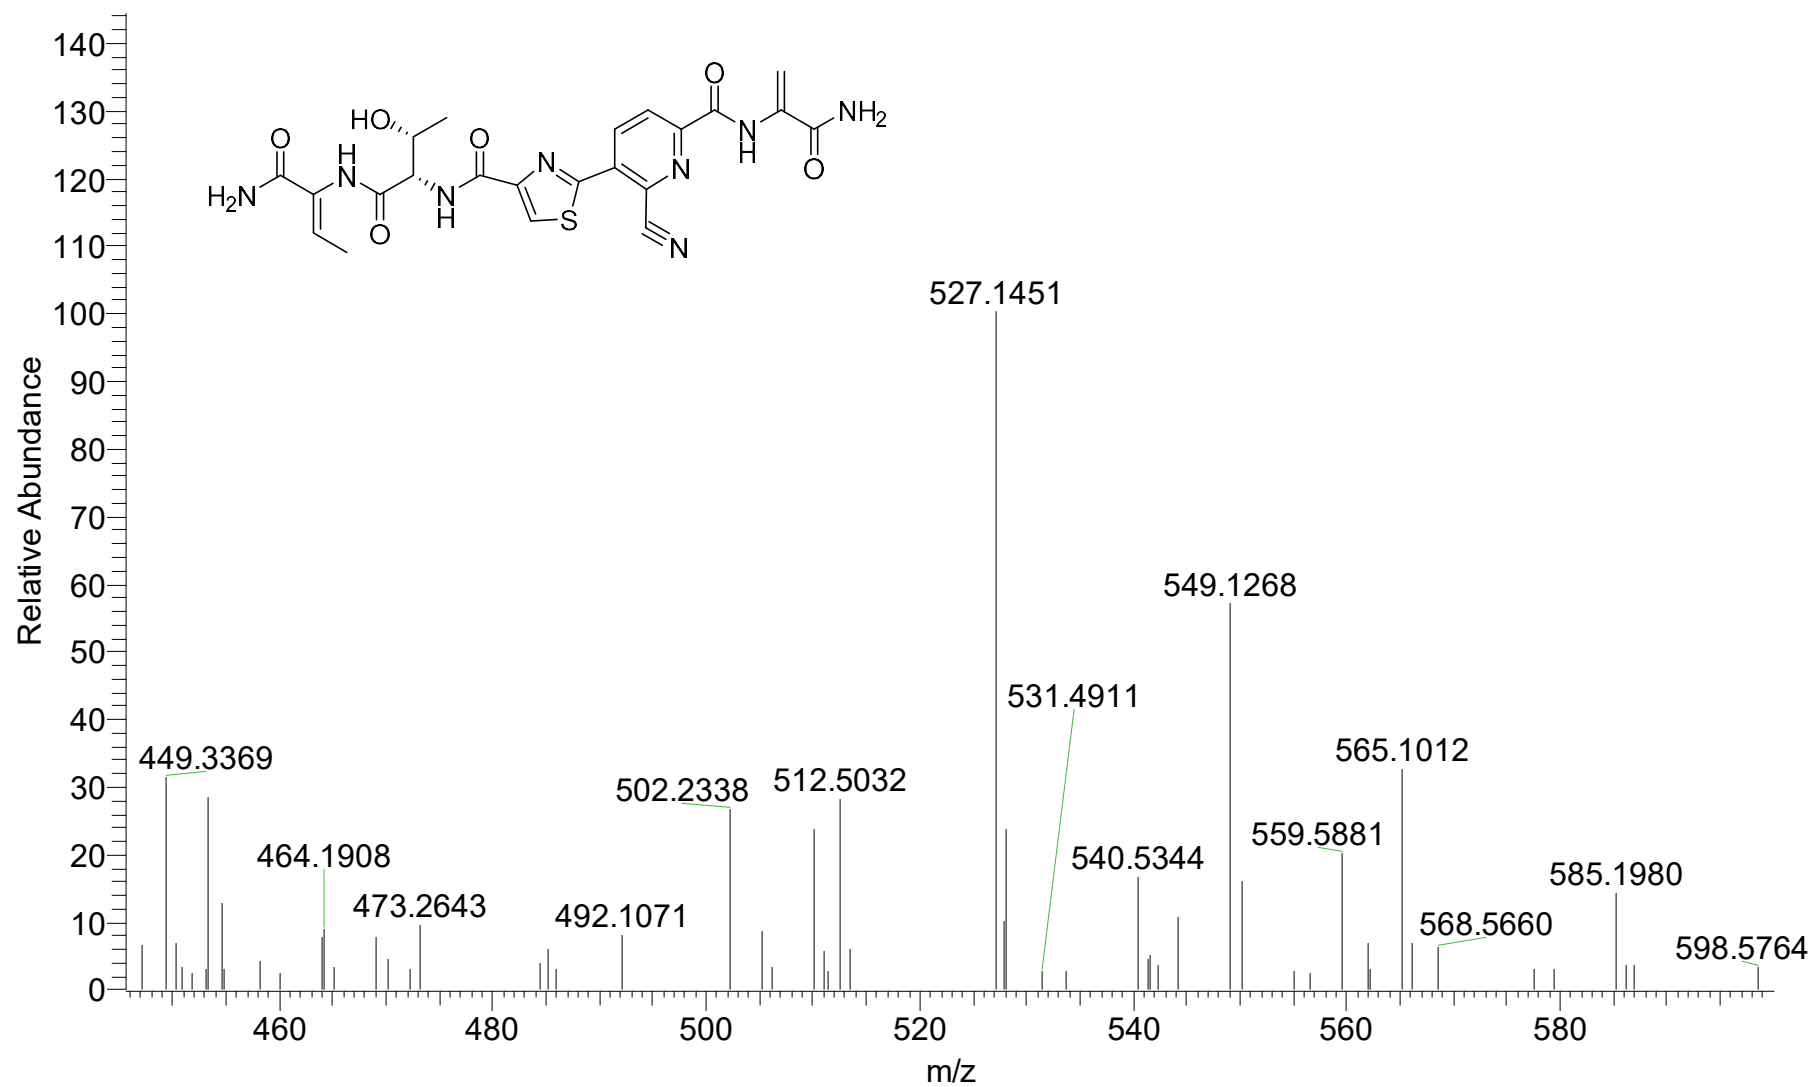

Figure S10. UV spectrum of 1

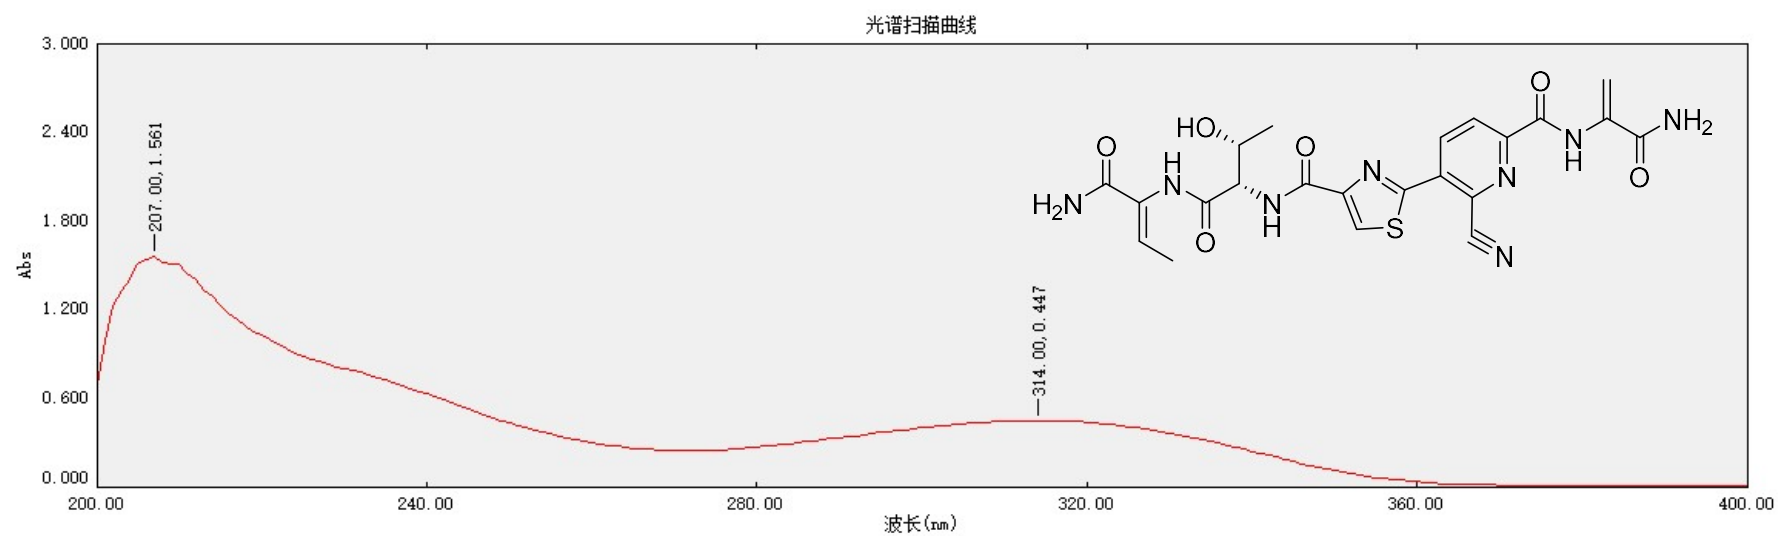

Figure S11. ECD spectrum of 1

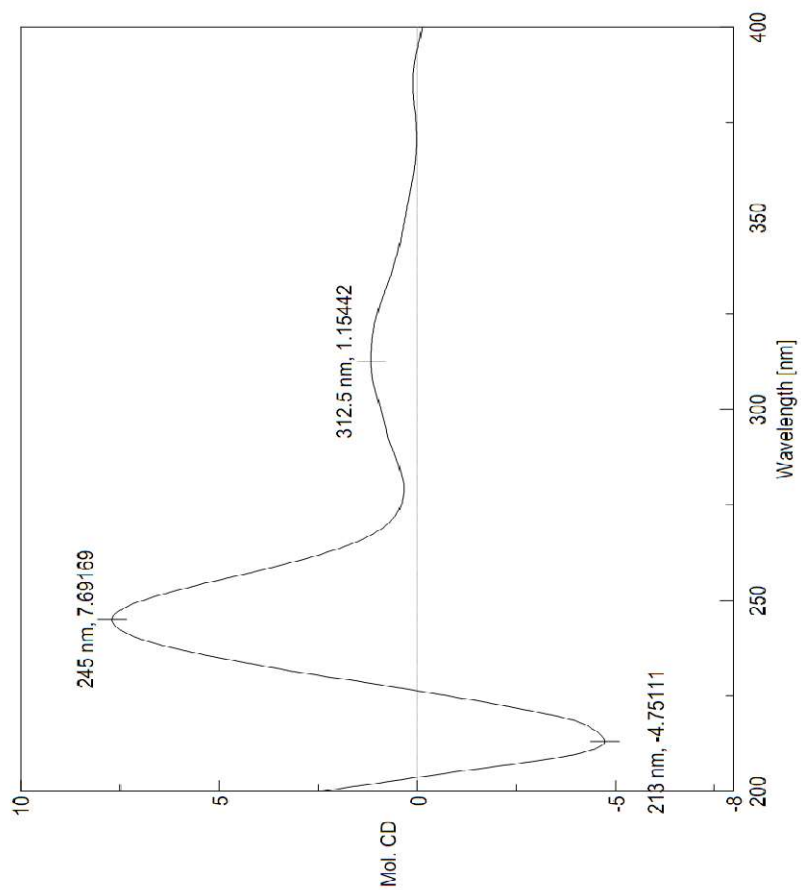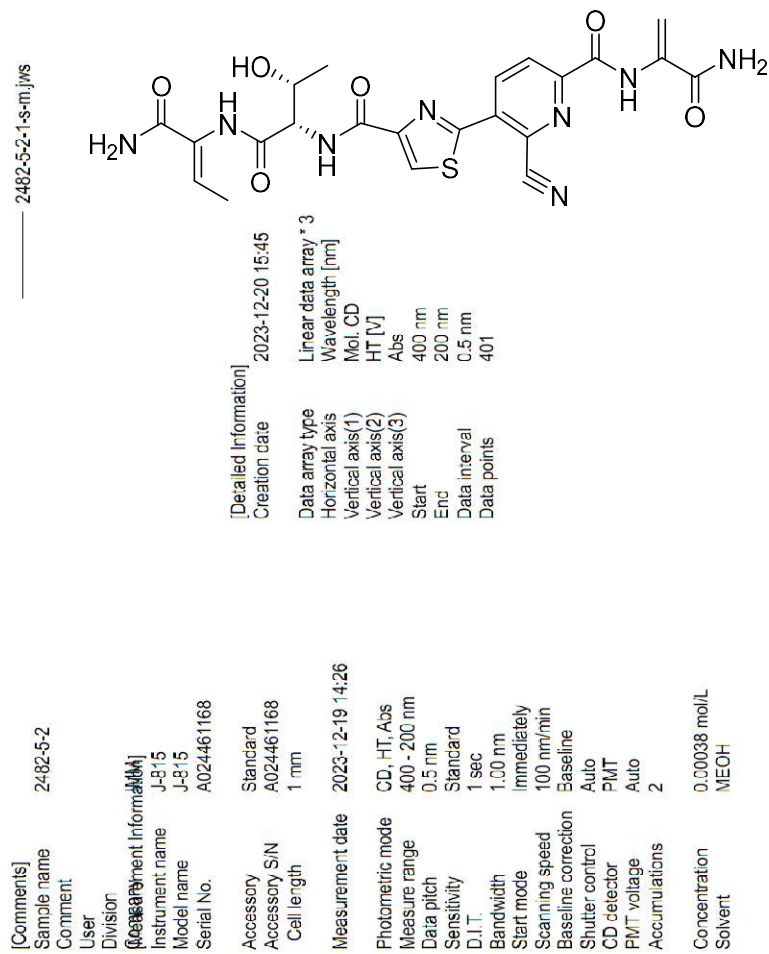

Supplement: d4ra01496k1.pdf [file d4ra01496k1.pdf]
